# Supplementary material
Source: publisher site journal article supplement (https://www.dovepress.com/article/595572)
Supplement: Supplementary file 1 [file 595572%20Supplementary%20Material.docx]

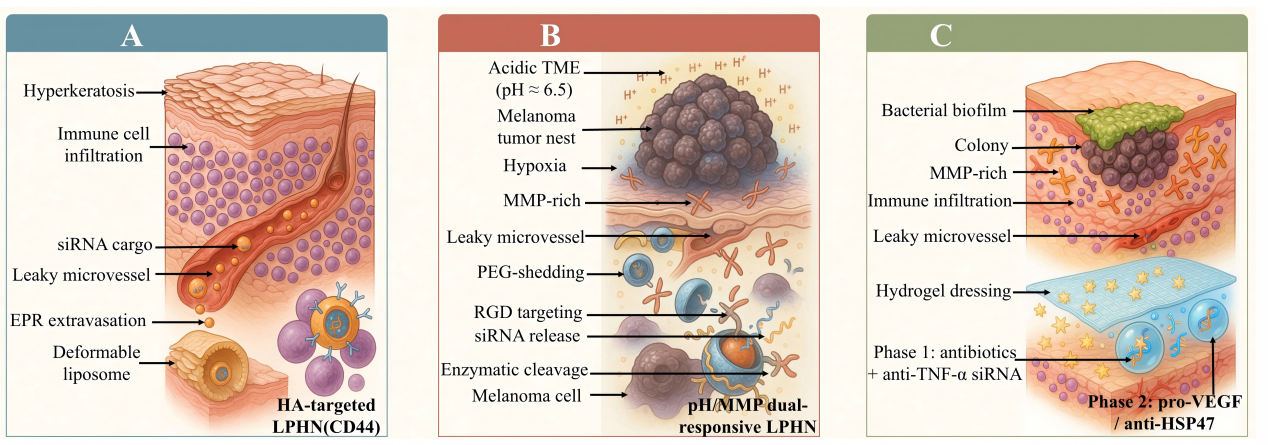


**Supplementary Figure 1** Tailored nanocarrier strategies for representative cutaneous pathologies (schematic, not to scale).

(**A**) Psoriasis: a hyperkeratotic stratum corneum and inflamed, leaky microvessels favour enhanced-permeation-and-retention (EPR) extravasation of a deformable, hyaluronic-acid-targeted LPHN that delivers anti-TNF-α/STAT3 siRNA to infiltrating immune cells.

(**B**) Melanoma: an acidic (pH ≈ 6.5), hypoxic and matrix-metalloproteinase-rich tumour microenvironment triggers PEG deshielding, charge reversal and MMP-mediated core degradation of an RGD-decorated pH/MMP dual-responsive LPHN, enabling intratumoral release of siRNA against PD-L1 or BRAF.

(**C**) Chronic wound: a protease- and biofilm-laden milieu is treated with a hydrogel dressing that sequentially liberates-Phase 1 (days 0-3) antibiotics plus anti-TNF-α siRNA, followed by Phase 2 (days 4-10) pro-angiogenic VEGF or anti-fibrotic HSP47 siRNA-thereby eradicating infection and promoting tissue

**Supplementary Table 1** Critical appraisal of major nanocarrier platforms for siRNA delivery

| Carrier Type | Typical Particle Size (nm) | Typical Zeta Potential (mV) | Typical Encapsulation Efficiency (%) | Typical In Vitro Silencing Efficiency (%) | Key Advantages | Principal Limitations |
| --- | --- | --- | --- | --- | --- | --- |
| Liposomes | 80-200 | +20 to +50 (cationic) or pH-responsive | 80-95 | 70-90 | Unparalleled biocompatibility, underscored by clinically approved therapeutics (e.g., Onpattro®) and extensive clinical data. | Prone to structural instability and premature payload leakage, demanding stringent manufacturing and storage protocols. |
| Polymer Nanoparticles (NPs) | 100-300 | +15 to +40 | 85-98 | 80-95 | Robust structural integrity and a versatile platform for surface functionalization, enabling facile engineering of stimulus-responsive systems. | The intrinsic cytotoxicity of many cationic polymers remains a major safety hurdle, often necessitating complex synthesis and purification. |
| Gold Nanoparticles (AuNPs) | 10-100 | Highly variable (-30 to +40), contingent upon surface chemistry | Highly variable, contingent upon conjugation strategy | 60-90 | Offer unique theranostic capabilities via surface plasmon resonance (SPR); benefit from a mature and versatile surface chemistry. | The primary drawback is their non-biodegradable inorganic core, raising significant concerns over long-term bioaccumulation and potential toxicity. |
| Mesoporous Silica Nanoparticles (MSNs) | 50-300 | Highly variable (-40 to +35), contingent upon functionalization | 90-99 | 80-95 | Unrivaled payload capacity stemming from an exceptionally high surface area and pore volume; possess a rigid and chemically stable scaffold. | Characterized by slow biodegradation kinetics; the risks of hemolysis and immunogenicity present significant hurdles to their clinical application. |
| Lipid-Polymer Hybrid Nanoparticles (LPHNs) | 100-250 | +10 to +35 | 85-98 | 80-95 | Represents an advanced design paradigm, synergistically merging the robust polymer core with the biomimetic lipid shell to achieve superior performance. | The principal translational barrier remains their complex, multi-step fabrication, which elevates manufacturing costs and complicates scalability. |

**Supplementary Table 2** A Critical appraisal of siRNA molecular modification and protection strategies

| Protection Strategy | Mechanism of Action | Stability Enhancement | Gene Silencing Efficacy | Potential Immunogenicity | Strategic Advantage | Principal Constraint |
| --- | --- | --- | --- | --- | --- | --- |
| Binding Strategies |  |  |  |  |  |  |
| Electrostatic Interaction | Complexation of anionic siRNA with cationic carriers (e.g., DOTAP, PEI). | Low to Moderate | Moderate | Moderate | Operational simplicity; spontaneous self-assembly. | Fundamentally unstable in physiological media. |
| Disulfide Covalent Binding | Reversible covalent linkage, cleaved by the high intracellular glutathione concentration. | High (4.2-fold increase) | High (~90% retained) | Low | Confers robust extracellular stability with precise, triggered intracellular release. | Increased synthetic complexity and manufacturing cost. |
| Chemical Modification |  |  |  |  |  |  |
| 2'-O-methylation | Introduction of a methyl group at the 2'-hydroxyl position of the ribose. | High (3- to 5-fold half-life extension) | High | Markedly Reduced | Dramatically enhances nuclease resistance while suppressing immunogenicity. | Requires meticulous site-selection to preserve bioactivity. |
| Phosphorothioate Mod. | Substitution of a non-bridging oxygen with sulfur in the phosphodiester backbone. | Moderate to High | Moderate | Potentially Increased | Improves nuclease resistance and can enhance cellular uptake. | Risk of non-specific protein binding and potential off-target effects. |
| Hybrid Modification | Synergistic integration of 2'-F, 2'-O-methyl, and phosphorothioate modifications. | Very High (> 72 h in serum) | High | Low | Unlocks synergistic stability enhancement while preserving high silencing activity. | High manufacturing cost and complexity. |
| Carrier Surface Mod. |  |  |  |  |  |  |
| PEG Modification | Formation of a hydrophilic "stealth" corona that reduces opsonization. | High (e.g., 3.6-fold half-life extension) | Potentially Decreased | Markedly Reduced | Prolongs circulation half-life and minimizes non-specific interactions. | The inherent "PEG dilemma" can severely impede cellular uptake. |
| Cholesterol Modification | Anchoring and stabilization of the lipid bilayer in liposomal carriers. | Moderate to High | Unaffected | None | Reduces lipid exchange, preventing premature carrier disassembly. | May lead to an undesirable increase in final particle size. |
| Targeting Ligand Mod. | Conjugation of ligands for receptor-mediated endocytosis by target cells. | No direct effect on stability | Markedly Increased in Target Cells | Potentially Increased | Enables precision targeting, maximizing on-target efficacy. | Imposes significant manufacturing complexity and can compromise stealth properties. |

Supplementary Table 3 A critical appraisal of transdermal delivery technologies

| Transdermal Technology | Mechanism of Action | Delivery Depth Enhancement | Applicable Nanocarrier Types | Permeation Enhancement | Applicable Skin Conditions | Clinical Practicability | Strategic Advantage | Principal Constraint |
| --- | --- | --- | --- | --- | --- | --- | --- | --- |
| Carrier Engineering |  |  |  |  |  |  |  |  |
| Particle Size Optimization | Tuning nanoparticle size to exploit specific permeation pathways. | 1.7-fold increase for 65 nm vs. 125 nm particles. | All types | Moderate | All conditions | High | Simple, formulation-intrinsic approach. | Efficacy is highly susceptible to barrier integrity. |
| Surface Charge Modulation | Optimizing surface charge for electrostatic-driven permeation. | ~1.5-fold average increase. | All types | Moderate | All conditions | High | Simple, formulation-intrinsic approach. | The fine line between efficacy and cytotoxicity. |
| Biphasic Charge Conversion | Intelligent, environment-responsive alteration of surface charge. | 1.8-fold increase. | Primarily organic carriers | High (56% increase in gene silencing). | All conditions | Medium | Balances initial adhesion with deep penetration. | Increased design complexity and stability concerns. |
| Deformable Vesicles |  |  |  |  |  |  |  |  |
| Transfersomes | Incorporation of edge activators to confer extreme membrane flexibility. | Traverses pores 5-10x smaller than own diameter. | Liposome-based | High | Healthy & mildly compromised | Medium-High | Superior deformability; excellent biocompatibility. | Reduced performance in severely damaged skin. |
| Ethosomes | High ethanol content (20–45%) fluidizes stratum corneum lipids. | 3–4 fold greater than conventional liposomes. | Liposome-based | Very High | Healthy & mildly compromised | Medium | Potent permeation enhancement; simple preparation. | Risk of local irritation and barrier disruption. |
| Ultra-elastic Vesicles | Synergistic combination of high flexibility and surfactants. | > 5-fold flux increase over conventional liposomes. | Liposome-based | Very High | All conditions | Medium | Unparalleled efficiency under minimal driving force. | High formulation complexity and manufacturing cost. |
| Physical-Assisted Tech. |  |  |  |  |  |  |  |  |
| Microneedle Arrays | Creation of transient microconduits with micrometer-scale needles. | 300-1000 μm (direct dermal access). | All types | Very High | All conditions | Medium-High | Completely bypasses the SC barrier; minimally invasive. | Requires applicator; potential for mild pain/discomfort. |
| Fractional Laser | Generation of microchannels via controlled thermal ablation. | Depth increased from 85 to 217 μm (~2.6-fold). | All types | High (~3-fold increase in gene silencing). | All conditions | Medium | Precise and controlled; minimally traumatic. | Requires professional equipment and operation; costly. |
| Low-Frequency Sonophoresis | Cavitation-induced transient disruption of SC lipid structure. | Moderate | All types | High (4.2-fold flux increase). | Healthy & mildly compromised | Low-Medium | Needle-free; suitable for large-area application. | Technically complex; risk of non-uniform effects. |

**Supplementary Table 4** Characteristics of stimuli-responsive nanodelivery systems (High-Impact)

| Response Type | Triggering Condition | Response Mechanism | Applicable Nanocarriers | Response Time | Release Profile | Applicable Pathological Microenvironment | Key Advantages | Major Limitations |
| --- | --- | --- | --- | --- | --- | --- | --- | --- |
| pH-Responsive |  |  |  |  |  |  |  |  |
| Acid-Labile Linkage | pH decrease (e.g., to 6.5) | pH-dependent hydrolysis of covalent bonds | Polymer-based carriers, liposomes | Minutes to hours | Controllable, sustained release | Inflammation (pH 6.0–6.5), tumors (pH 6.5–7.0) | Intrinsic selectivity for acidic microenvironments | Requires precise tuning of pH sensitivity |
| Charge Reversal | Acidification-triggered protonation | Protonation of ionizable moieties (histidine, DMA) | Polymer-based carriers, liposomes | Seconds to minutes | Rapid, switch-like response | Inflammation, tumors, endosomes (pH 5.0–6.5) | Solves two barriers: uptake & endosomal escape | Risk of premature system destabilization |
| Enzyme-Responsive |  |  |  |  |  |  |  |  |
| MMP-Sensitive | Elevated MMP-2/9 activity | Specific enzymatic cleavage of a peptide linker | Peptide-modified nanocarriers | Minutes to hours | Site-specific release | Psoriasis, tumors, chronic wounds | Superior target selectivity; mitigates off-target effects | High inter-patient enzymatic variability |
| Lysosomal Enzyme | Acid hydrolases (e.g., cathepsin B) | Peptide linker cleavage within lysosomes | Peptide-modified polymer conjugates | Hours | Facilitates intracellular release (2.9x ↑) | Intracellular/endo-lysosomal compartment | Maximizes cytosolic bioavailability | Potential for payload degradation |
| Light/Thermo-Responsive |  |  |  |  |  |  |  |  |
| NIR Light | NIR irradiation (700–1000 nm) | Photothermal effect | Gold nanorods, upconversion NPs | Seconds | Rapid, on-demand release | Superficial cutaneous lesions | Unparalleled spatiotemporal precision; non-invasive | External hardware dependency; limited penetration depth |
| Magnetic | Alternating magnetic field (AMF) | Magnetothermal or mechanical effects | Superparamagnetic iron oxide NPs | Seconds to minutes | Remotely controllable release | Anatomical regions accessible to AMF | Enables remote actuation and magnetic targeting | External hardware dependency; biocompatibility needs validation |
| Multi-Responsive |  |  |  |  |  |  |  |  |
| pH/Enzyme Dual | pH change & enzyme activity | Synergistic activation of discrete mechanisms | Composite nanosystems | Tunable | Phased/synergistic release (3.8x ↑) | Complex pathological environments | Synergistically enhanced targeting and efficacy | Intricate design; elevated manufacturing costs |
| Cascade-Responsive | Sequential multi-stimuli activation | Programmed, sequential activation cascade | Multifunctional composite carriers | Precisely programmable | Precisely timed, sequential release | Diseases requiring staged therapeutic intervention | Biomimetic; offers maximal therapeutic control | High system complexity; reproducibility challenges |
